# Supplementary material for: Joint changes in RNA, RNA polymerase II, and promoter activity through the cell cycle identify non-coding RNAs involved in proliferation
Source: PubMed Central journal article supplement (PMC8460802; doi:10.1038/s41598-021-97909-w), 2021-09-23
Supplement: 41598_2021_97909_MOESM1_ESM.pdf [file 41598_2021_97909_MOESM1_ESM.pdf]

## Supplementary methods

### Supplementary method 1- RNA-seq library preparation

Briefly, 900 ng total RNA was used as starting material. The first step involved the removal of ribosomal RNA (rRNA) using biotinylated, target-specific oligos combined with Ribo-Zero rRNA removal beads. Following purification, RNA was fragmented into small pieces using divalent cations at 94°C for 4 min. First and second strand cDNAs were synthesized using random oligonucleotides and SuperScript II, followed by DNA polymerase I and RNase H. Exonuclease/polymerase was used to produce blunted overhangs. Illumina SR adapter oligonucleotides were ligated to the cDNA after 3' end adenylation. DNA fragments were enriched by 15 cycles of PCR. The libraries were purified using the AMPure XP (Beckman Coulter, Inc., Indianapolis, IN, USA), quantitated by qPCR using KAPA Library Quantification Kit (Kapa Biosystems, Inc., Wilmington, MA, USA), and validated using Agilent High Sensitivity DNA Kit on a Bioanalyzer (Agilent Technologies, Santa Clara, CA, USA). The size range of the DNA fragments was measured to be in the range of 210-850 bp and peaked around 310 bp. Prior to sequencing, the libraries were quantified (KAPA Library Quantification Kit (Illumina/ABI Prism)), normalized, pooled, and size selected (Ampure XP beads). Then each pool was quantified again. The pooled purified libraries were normalized and 20 pM was subject to clustering (by a cBot Cluster Generation System on a HiSeq2500 Rapid run mode flow cell (Illumina)), according to manufacturer's instructions.

### Supplementary method 2-Chromatin Immunoprecipitation (ChIP)

For each time point in the cell cycle, ~ 3.5 million HaCaT cells were washed twice with PBS, cross-linked with 0.5% formaldehyde at room temperature for 10 min, following addition of 125 mM glycine to stop the cross-linking. Cells were washed again with PBS and scraped from the plates in PBS supplemented with 1mM EDTA and protease inhibitors. Cross-linked cells were collected by centrifugation and resuspended in 1 ml cold RIPA buffer (10 mM Tris pH 8.0, 1 mM EDTA, 140 mM NaCl, 1% Triton X-100, 0.1% SDS, 0.1% Na-Deoxycholate) supplemented with protease inhibitors and 125 mM glycine. Samples were frozen in liquid nitrogen and stored at -80°C. Later, cells were thawed and sonicated, using a model 250 Sonifier (Branson Ultrasonic Corporation), at 20% duty cycle, 2.5 output control, 1 min x 10 with 30 sec pauses in between. To further digest the DNA, cells were treated with 400 U of Micrococcal Nuclease (NEB, M02475) at 37°C for 15 min. Debris was removed by centrifuging (16.000 x g) at 4°C for 15 min and soluble chromatin supernatant equivalent to 3.5 x 10<sup>6</sup> cells/IP was pre-cleared using 20 µl of a 1:1 mix of protein A and protein G Dynabeads (Invitrogen). Overnight immunoprecipitation was performed using either two µg of anti-H3K4me3 (Diagenode, C1541003-50), anti-H3K27me3 (Diagenode, C15410195), anti- Pol II (Diagenode, C15200004), or the non-specific immunoglobulin G (IgG) antibodies Mouse IgG (Diagenode, C15400001) and Rabbit IgG (Diagenode, C15410206). Antibody-protein complexes were immunoprecipitated with protein A/G Dynabeads for 3 hours at 4°C, then washed five times with RIPA buffer supplemented with protease inhibitors, once with LiCl wash buffer (250 mM LiCl, 10 mM Tris pH 8.0, 1 mM EDTA, 0.5% NP-40, 0.5% Na-Deoxycholate) supplemented with protease inhibitors, and once in TE (10 mM Tris-HCl pH 8.0, 1 mM EDTA). Immunoprecipitated DNA was reverse cross-linked by adding 1 µl RNaseA [10 mg/ml] and incubated at 37°C for 30 min. Then we added 2.5 µl 20% SDS and 5 µl Proteinase K [10mg/ml] and incubated at 55°C for 1 hour, followed by purification using QIAquick PCR purification kit (Qiagen, 28104).

### **Supplementary method 3- ChIP-seq library preparation**

ChIP-seq libraries were prepared using the MicroPlex Library Preparation Kit v4 (Diagenode) in accordance with the manufacturer's protocol. In brief, ~1 ng immunoprecipitated dsDNA was used as input in the template preparation process that provides efficient end repair of the fragmented dsDNA input. Further, library synthesis was performed by ligation of MicroPlex patented stem-loop adapters. The stem-loop adapters with blocked 5' ends were ligated to the 5' end of the genomic DNA, leaving a nick at the 3' end. Next, a library amplification step was performed, which enabled extension of the template, cleavage of the stem-loop adapters, and amplification of the library. In the final step, the 3' ends of the genomic DNA were extended to complete library synthesis and Illumina-compatible indexes were added through a high-fidelity amplification. Prior to sequencing, the libraries were quantified using the KAPA Library Quantification Kit (Illumina/ABI Prism), normalized, pooled, and size selected (Ampure XP beads). Then each pool was quantified again. The pooled purified libraries were normalized, and 20 pM was subject to clustering (by a cBot Cluster Generation System on a HiSeq2500 HO flow cell (Illumina)), according to manufacturer's instructions.

### **Supplementary method 4- Western blot analysis**

In the cell synchronization experiments, cells were washed once with cold PBS before pelleted, snap-frozen, and stored at -80°C. Total protein extracts for Pol II analysis were prepared by resuspending cell pellets in 1 x pellet-cell-volume (PCV) of Buffer I (10 mM Tris-HCl pH 8.0, 200 mM KCl, 1 mM DTT, protease inhibitor) and 1 x PCV of Buffer II (10 mM Tris-HCl pH 8.0, 200 mM KCl, 2 mM EDTA, 40% Glycerol, 0.5% Triton X-100, 0.5% NP-40, 1 mM DTT, protease inhibitor). The mixture was gently shaken for 2 hours at 4°C, extracts were cleared by centrifugation, and protein concentrations were measured using the Bradford method (Bio-Rad). Total protein extracts for H3K4me3 and H3K27me3 analysis were isolated using Allprep DNA/RNA/protein mini Kit (Qiagen, 80004) according to the manufacturer's protocol, except that the lysis buffer in the last step was replaced with SDS buffer. The protein concentration was measured using Direct Detect assay free cards (Merc, DDAC00010-GR) and analyzed on a Direct Detect Infrared Spectrometer. Proteins were separated by electrophoresis on NuPAGE 4-12% Bis-Tris gels (Invitrogen, NP0322BOX) and blotted onto PVDF membranes by standard procedures. PVDF membrane for high molecular weight proteins (Amersham Hybond, 10600023) was used for RNA Pol II detection and PVDF membrane for low molecular weight proteins (Amersham Hybond, 10600061) was used for H3K4me3 and H3K27me3 detection. Primary antibodies for RNA Pol II (Diagenode, C15200004), H3K4me3 (Diagenode, C15410003), and H3K27me3 (Diagenode, C15410195) were diluted [1:1000] in 5% dry milk in PBS containing 0.1% Tween and membranes were incubated overnight at 4°C. Anti-beta Actin (Abcam, ab8226) [1:5000] was used as loading control. The secondary antibodies IRDye 800CW goat anti-rabbit (LI-COR Biosciences, 925-32211) and 680RD goat anti-mouse (LI-COR Biosciences, 926-68070) were used in a [1:15000] dilution and membranes were visualized using the LI-COR Biosciences detection system.

## Supplementary figures and tables

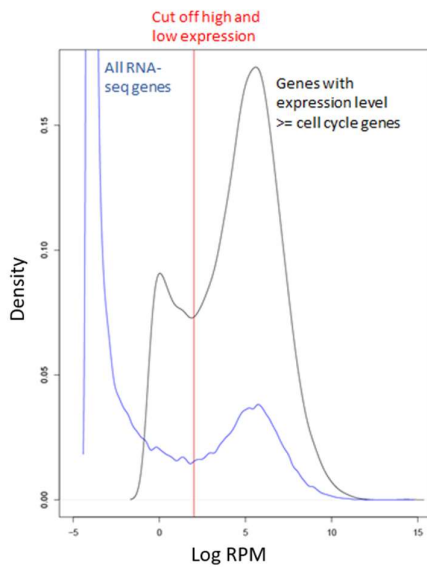

**Supplementary Figure S1: Density plot of the bimodal distribution of RNA-seq expression.** The blue line represents the mean expression for all genes in the RNA-seq data set ( $n = 65988$ ). The black line represents genes with mean expression  $\geq$  the cell cycle gene with lowest mean expression ( $n = 14065$ ). This set of genes included cell cycle genes ( $n = 1803$ ) and genes with no significant cell cycle-dependent expression pattern (!CC genes,  $n = 12262$ ). The set of genes had a bimodal distribution of expression levels, where the red line represents the cut off between high and low RNA-seq expression. We divided the !CC genes into genes with high expression level (!CC\_high,  $n = 9259$ ) and genes with low expression level (!CC\_low,  $n = 3003$ ).

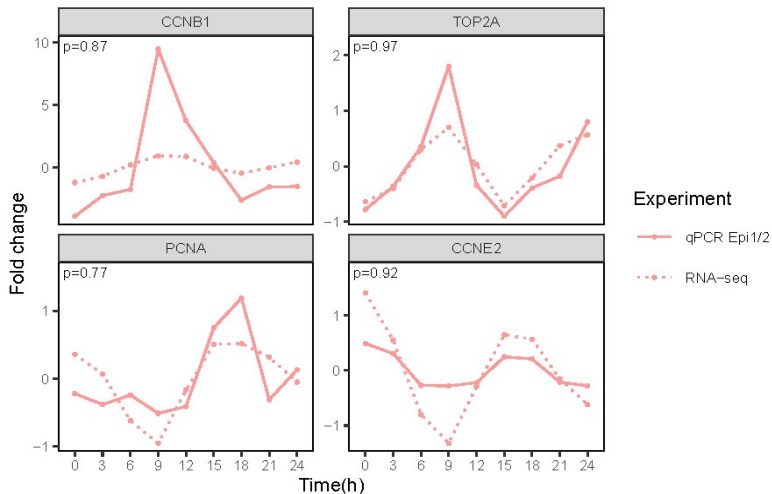

**Supplementary Figure S2: Technical validation of RNA-seq expression for *CCNB1*, *CCNE2*, *PCNA*, and *TOP2A*.** Spearman's correlation coefficients ( $\rho$ ) were calculated based on the mean RNA-seq expression per time point and mean RT-qPCR fold change per time point from the original experiments (Epi1, Epi2).

A)

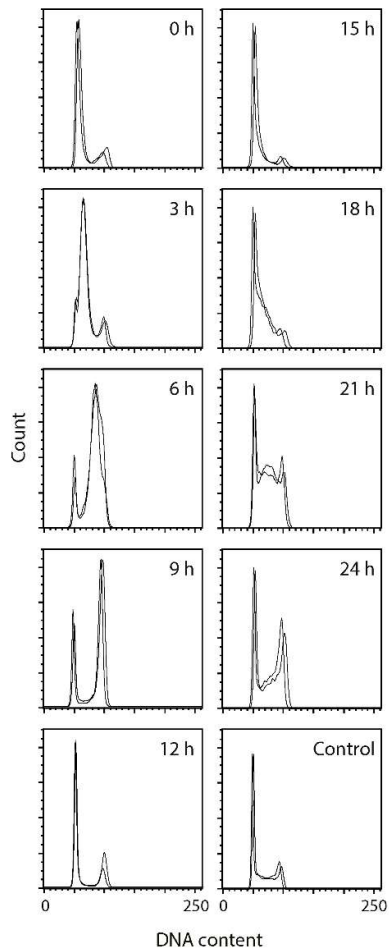

B)

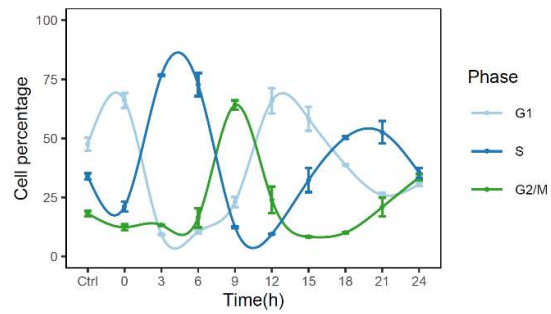

**Supplementary Figure S3: Synchrony of double thymidine blocked HaCaT cells from two validation experiments (Val1, Val2).** (A) Cell synchrony was monitored by flow cytometry of propidium iodide-stained cells. The figure shows superimposed DNA content profiles of the two replicate experiments for each time point. Horizontal axes show DNA content (arbitrary units) and vertical axes show the number of cells with the corresponding DNA content. Control is unsynchronized cells. (B) Percentage of cells assigned to G1, S, and G2/M phases for each of the time points analyzed. Values and error bars are averages and standard deviations ( $n = 2$ ).

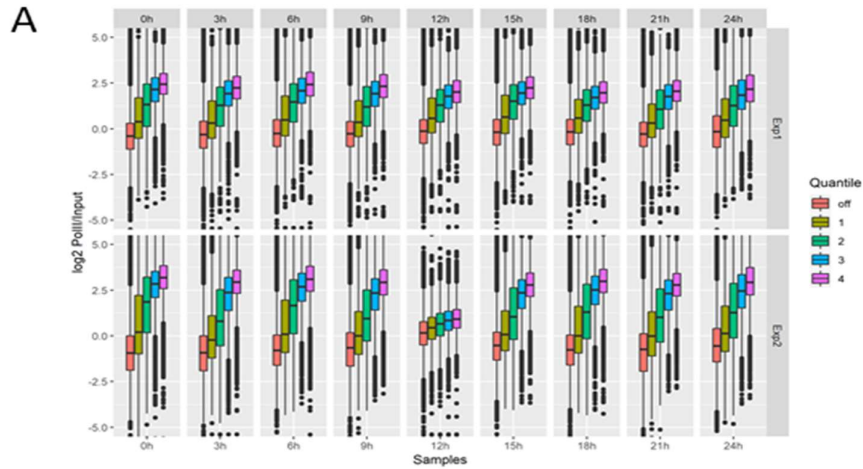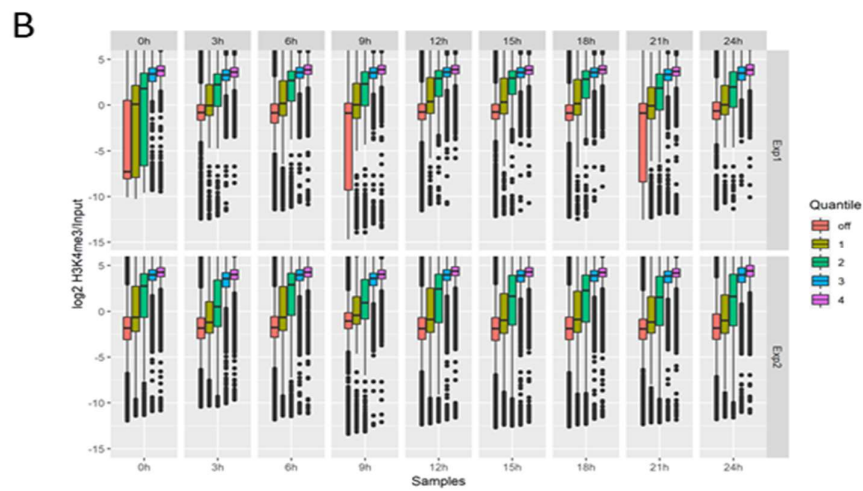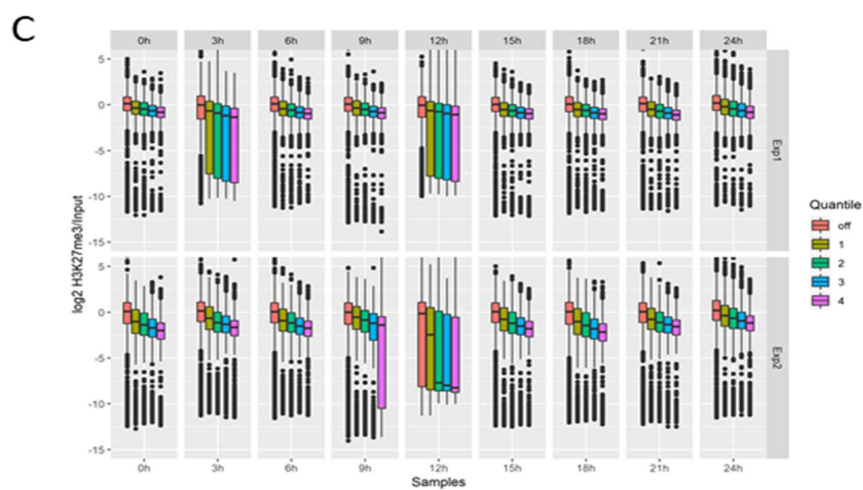

**Supplementary Figure S4: Average abundance of ChIP-seq signal in promoter regions around the transcription start site (TSS).** The sum of counts within each bin of size 50 around the TSS area of all annotated genes. We divided the genes into quantiles based on RNA-seq expression; off = genes not expressed, 1 = 0-25%, 2 = 25-50%, 3 = 50-75%, 4 = 75-100%. (A) Pol II ChIP-seq, (B) H3K4me3 ChIP-seq, and (C) H3K27me3 ChIP-seq.

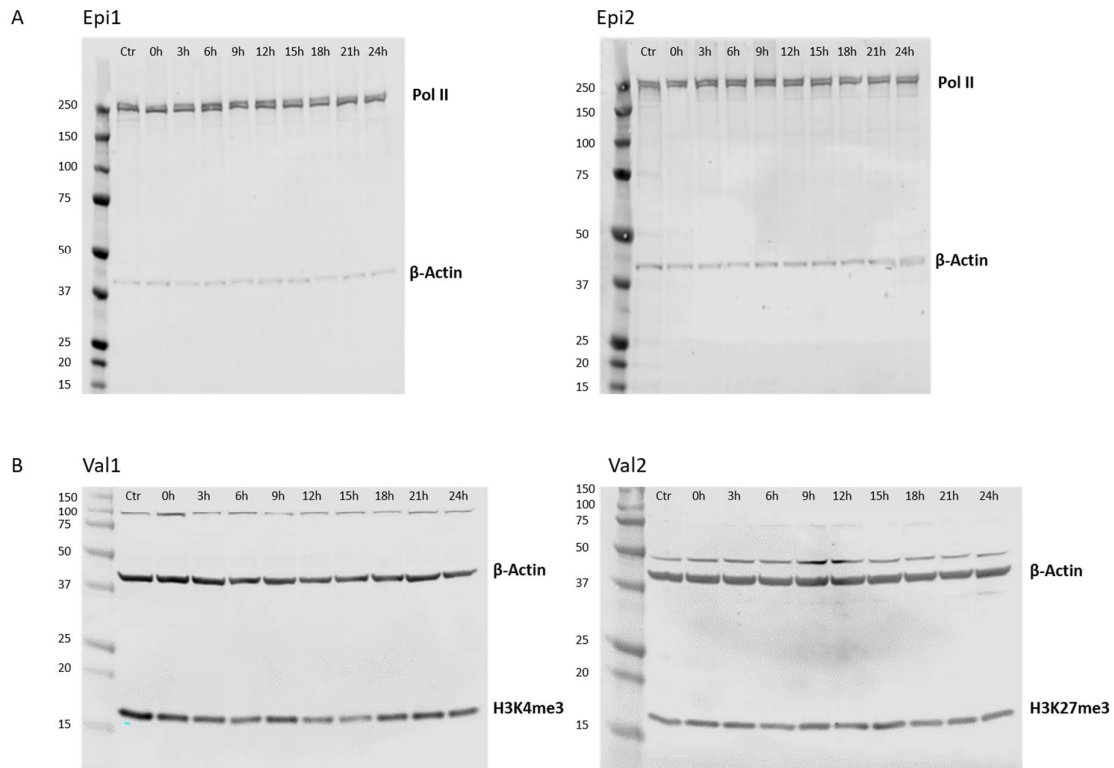

**Supplementary Figure S5: Western blot analysis.** (A) Pol II: Protein was isolated from the original experiments (Epi1,Epi2). (B) H3K4me3 and H3K27me3: Protein was isolated from the two validation experiments (Val1, Val2). Odyssey<sup>®</sup> Protein Molecular Weight Marker (cat.no 928-40000) was used as a ladder (10-250 kDa). Quantification (data not shown) indicated no changes during cell cycle or between the different synchronization experiments for Pol II, H3K4me3, or H3K27me3.

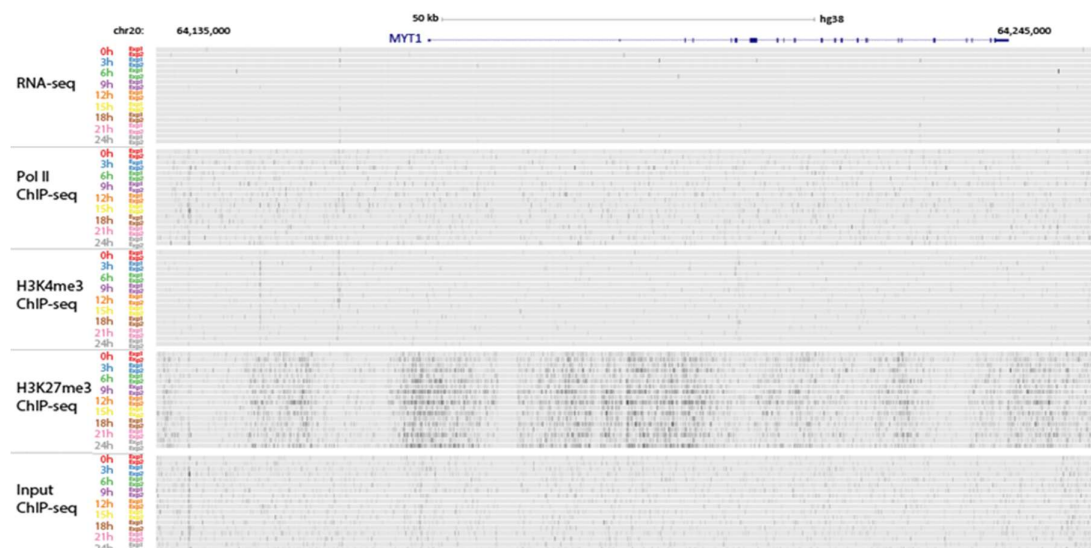

**Supplementary Figure S6: The UCSC Genome browser (GRCh38/hg38) view of RNA-seq and Pol II, H3K4me3, H3K27me3, and Input CHIP-seq data at the MYT1 (NM\_004535) gene locus.**

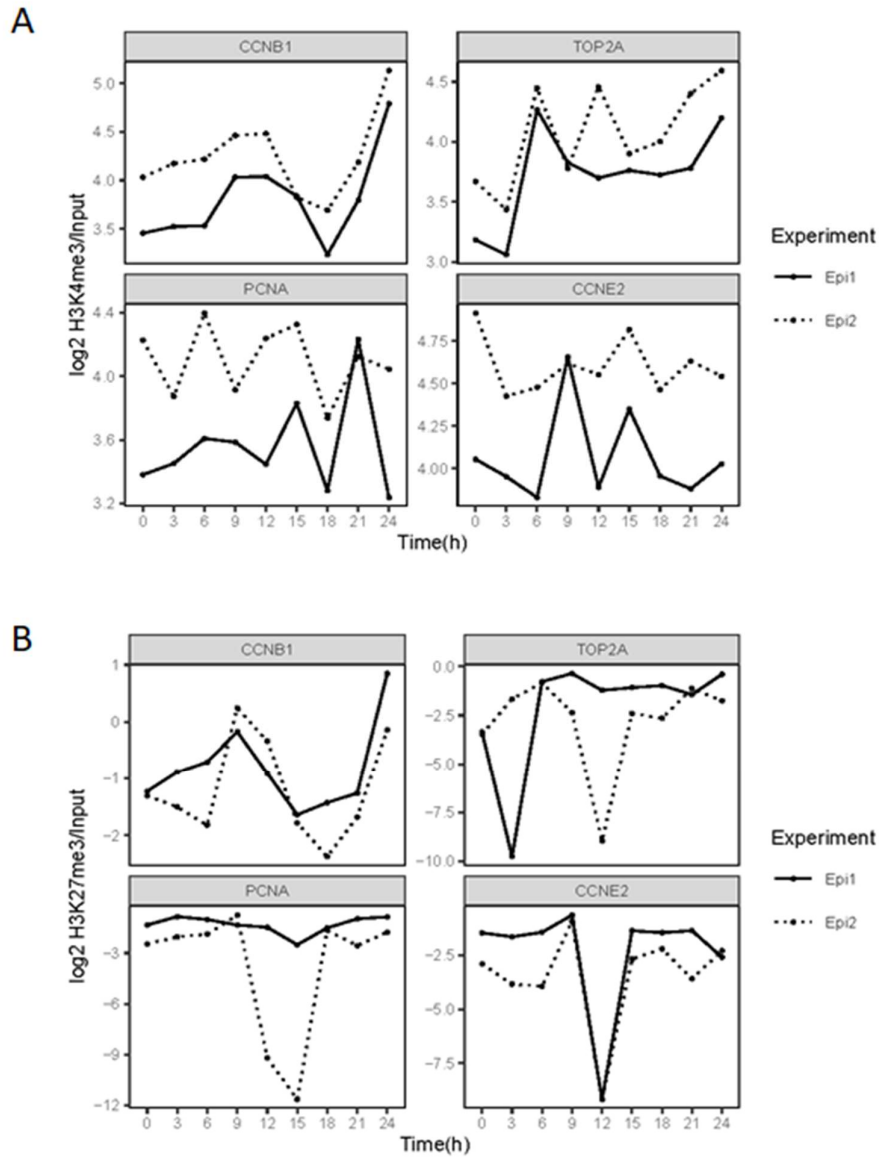

**Supplementary Figure S7: (A) H3K4me3 and (B) H3K27me3 ChIP-seq profiles for the cell cycle genes *CCNB1*, *CCNE2*, *PCNA*, and *TOP2A*. Negative values on the y axis for H3K27me3 ChIP-seq indicate the ChIP-seq signal is lower than the background (input) signal.**

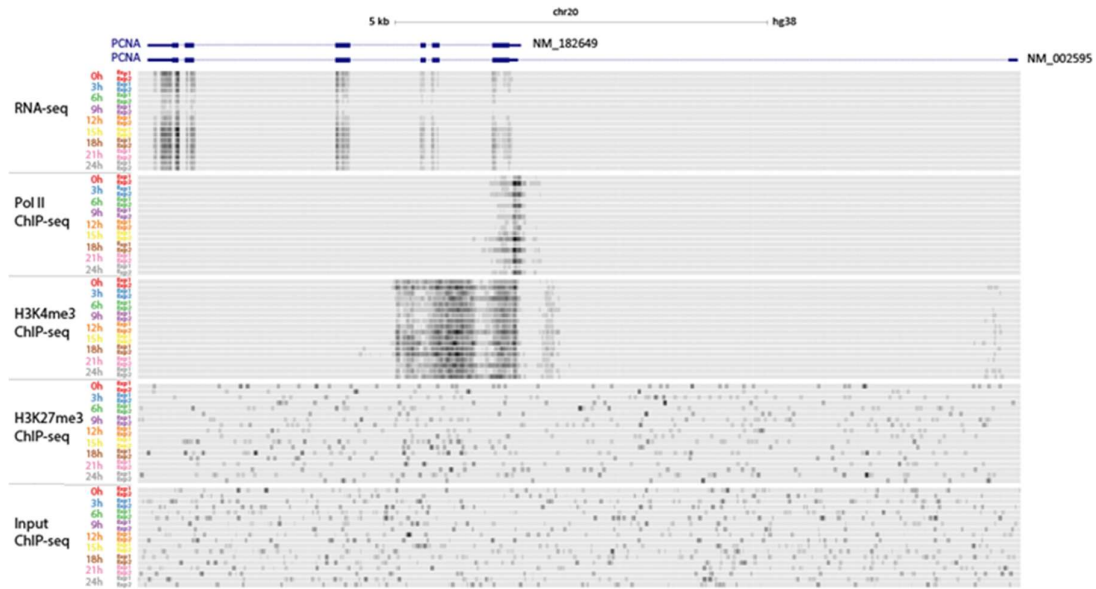

**Supplementary Figure S8:** The UCSC Genome browser (GRCh38/hg38) view of RNA-seq and Pol II, H3K4me3, H3K27me3, and Input ChIP-seq data at the *PCNA* (NM\_182649 and NM\_002592) gene locus. The Pol II and H3K4me3 data indicate that the short isoform (NM\_182649) and not the long isoform (NM\_002592) is being transcribed.

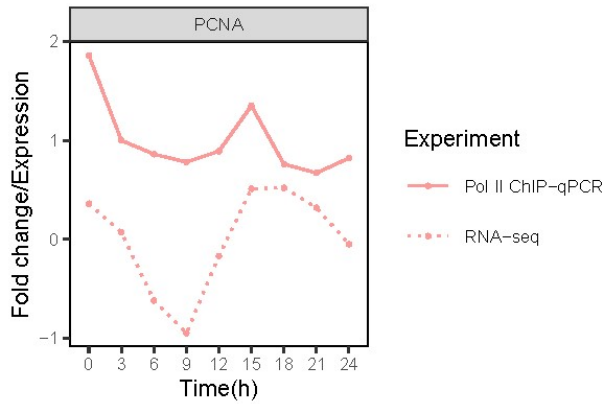

**Supplementary Figure S9:** *PCNA* Pol II ChIP-qPCR and RNA-seq expression. Expression is the mean RNA-seq expression per time point (Epi1, Epi2) and mean Pol II ChIP-qPCR fold change per time point from the new biological replicates (Val1, Val2).



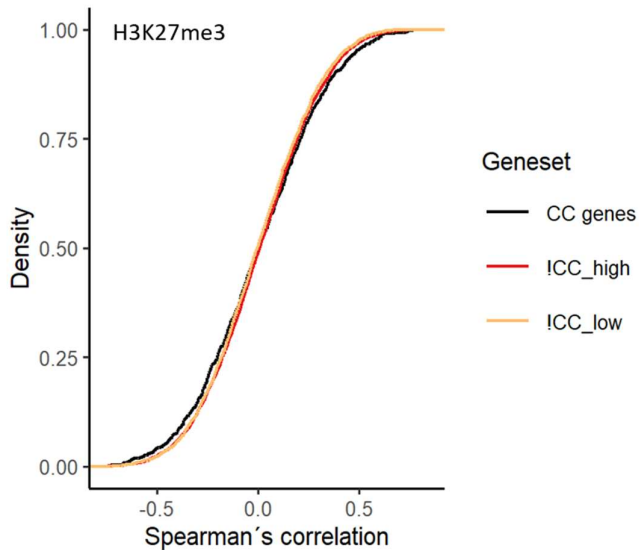

**Supplementary Figure S10: Spearman's correlation analysis of RNA-seq expression against H3K27me3 ChIP-seq signal.** There was no clear shift in the mean correlations for three gene sets CC genes, !CC\_high, and !CC\_low ( $p$ -values of 0.63, 0.023, and 0.84, respectively.) There were no significant differences between the gene sets (CC genes against !CC\_high  $p$ -value = 0.72 and CC genes against !CC\_low  $p$ -value = 0.60). Significant differences were determined by Student's  $t$ -test (unpaired, two-tailed) assuming unequal variances.

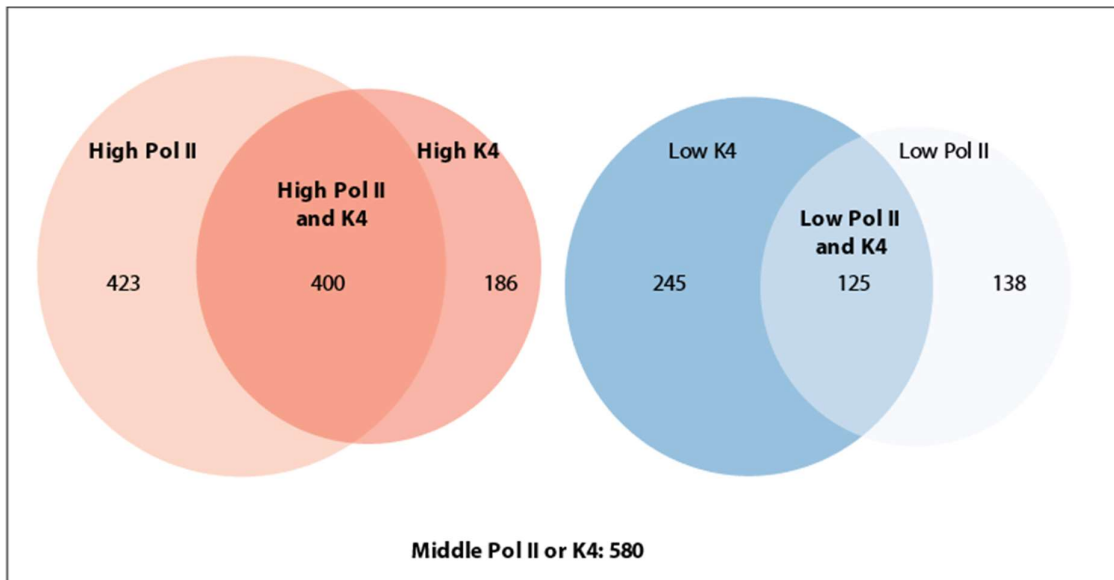

**Supplementary Figure S11: Venn diagram for cell cycle genes with combined Pol II and H3K4me3 (K4) signal (n = 1714).** Genes were divided in high ( $\rho > 0.2$ ), low ( $\rho < -0.2$ ), and middle ( $\rho > -0.2$  and  $\rho < 0.2$ ) correlated genes, based on the genes' Spearman's correlation value for RNA-seq expression against ChIP-seq signal. We did GO analysis for five different groups (in bold); high correlation for Pol II and K4 (n = 400), high correlation for Pol II (n = 423), high correlation for K4 (n = 186), middle correlation for Pol II or K4 (n = 580), and low correlation for Pol II and K4 (n = 125).

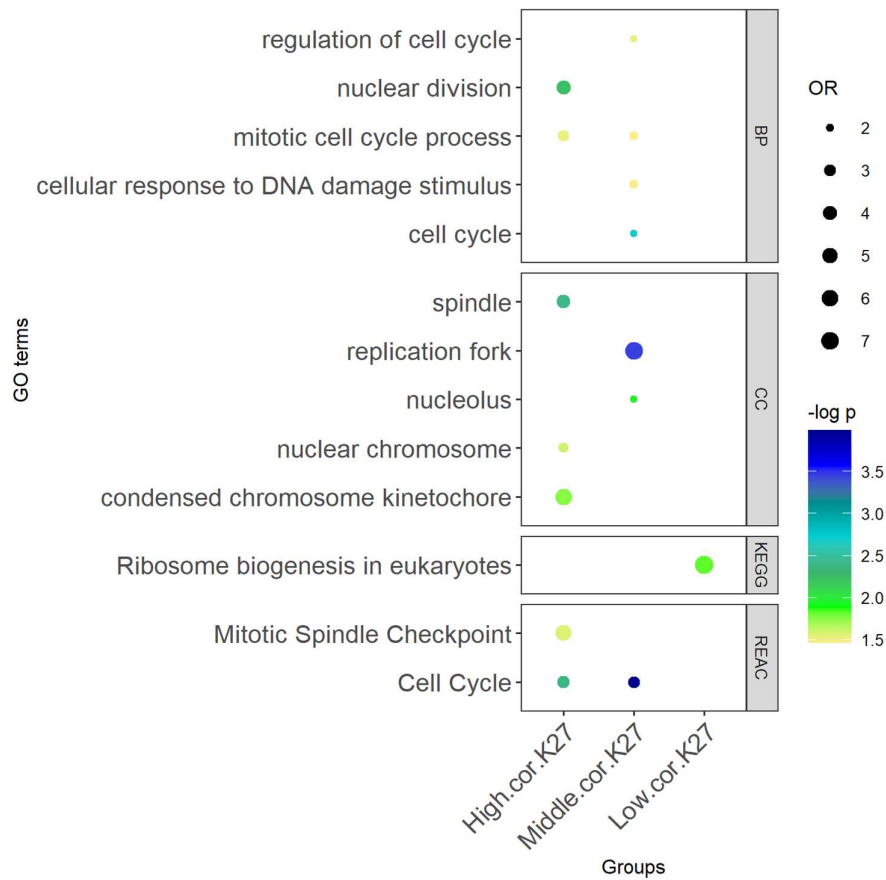

**Supplementary Figure S12: Gene ontology (GO) analysis for cell cycle genes correlated with H3K27me3.** The results show GO biological process (BP), cellular component (CC) terms, and KEGG and REACTOME pathways significantly enriched ( $p$ -values  $< 0.05$ ) for cell cycle genes divided in three different groups; high correlation ( $\rho > 0.2$ ), middle correlation ( $\rho > -0.2$  and  $\rho < 0.2$ ), and low correlation ( $\rho < -0.2$ ). Correlation values are the results of Spearman's correlation analysis of RNA-seq expression against H3K27me3 signal.

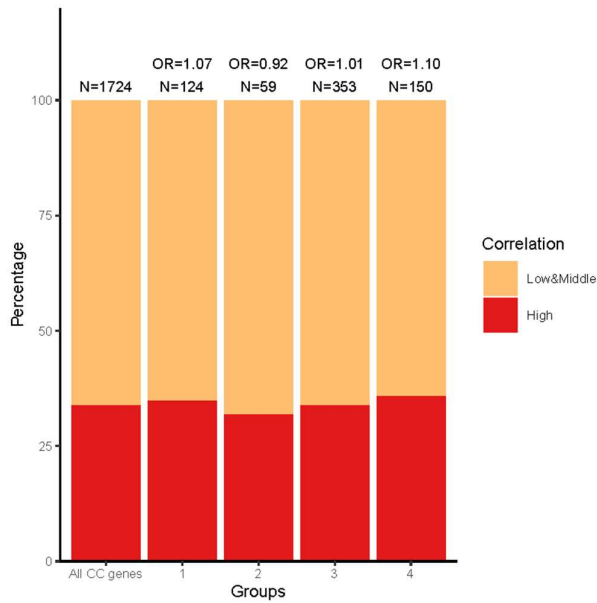

**Supplementary Figure S13: Odds ratios from Fisher's exact tests for H3K4me3.** We compared the fraction of highly correlated genes in the four gene groups (Figure 3D) with all cell cycle (CC) genes with H3K4me3 signals in their TSS (n = 1734). *P*-values (ns): group 1 *p* = 0.77, group 2 *p* = 0.89, group 3 *p* = 0.95, and group 4 *p* = 0.59.

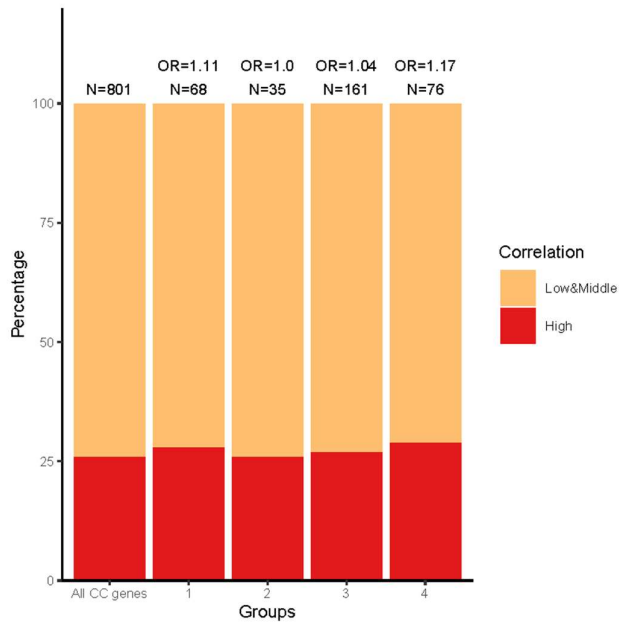

**Supplementary Figure S14: Odds ratios from Fisher's exact tests for H3K27me3.** We compared the fraction of highly correlated genes in the four gene groups (Figure 3D) with all cell cycle (CC) genes with H3K27me3 signals in their TSS (n = 801). *P*-values (ns): group 1 *p* = 0.77, group 2 *p* = 1, group 3 *p* = 0.84, and group 4 *p* = 0.58.

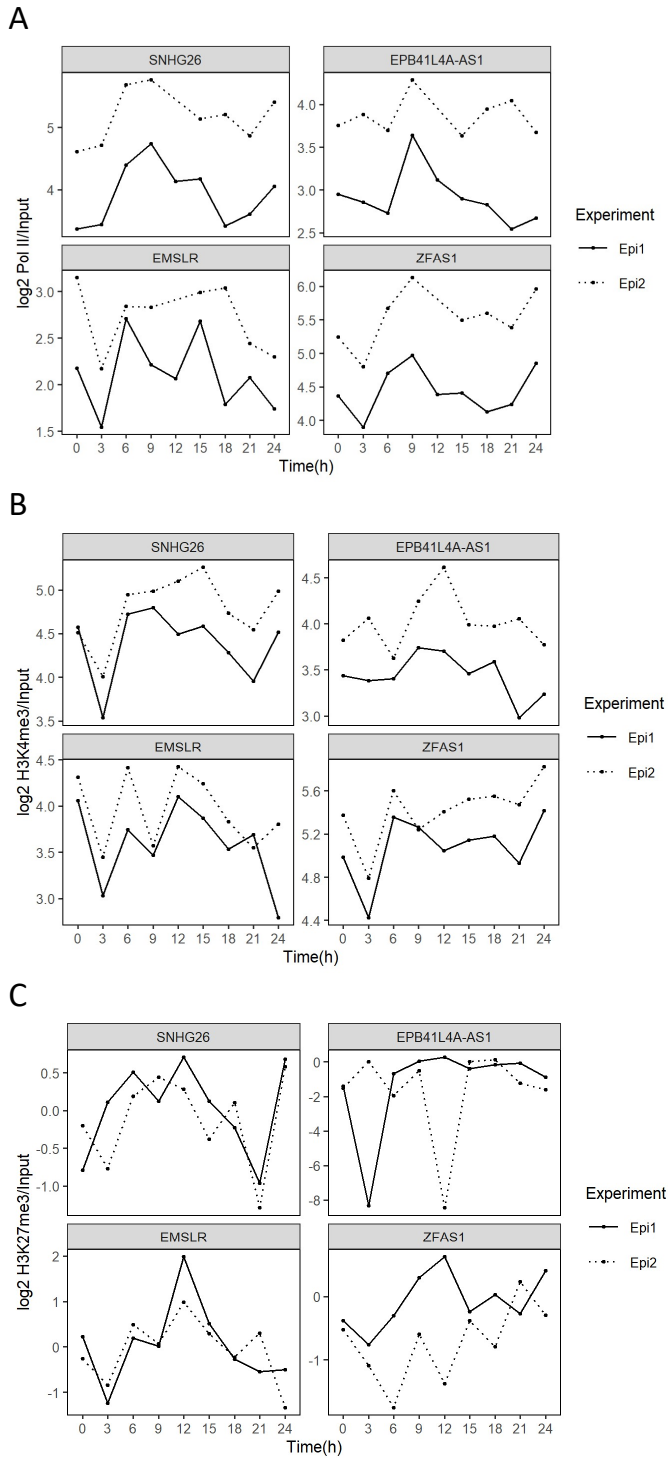

**Supplementary Figure S15: ChIP-seq data for the four lncRNA candidates. (A) Pol II, (B) H3K4me3, and (C) H3K27me3 ChIP-seq profiles for *SNHG26*, *EPB41L4A-AS1*, *EMSLR*, and *ZFAS1*.**

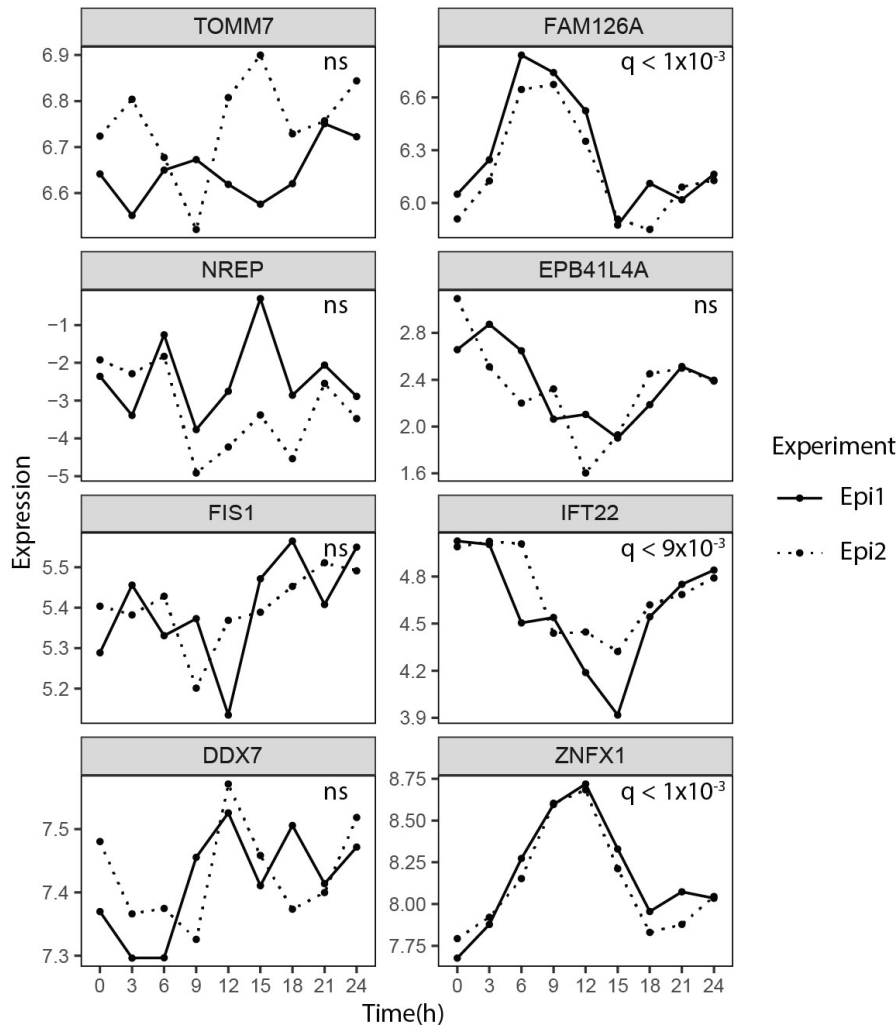

**Supplementary Figure S16: RNA-seq profiles for IncRNA neighboring genes.** *SNHG26* (TOMM7 and FAM126A), *EPB41L4A-AS1* (NREP and EPB41L4A), *EMSLR* (FIS1 and IFT22), and *ZFAS1* (DDX7 and ZNFX1). q = the false discovery rate.

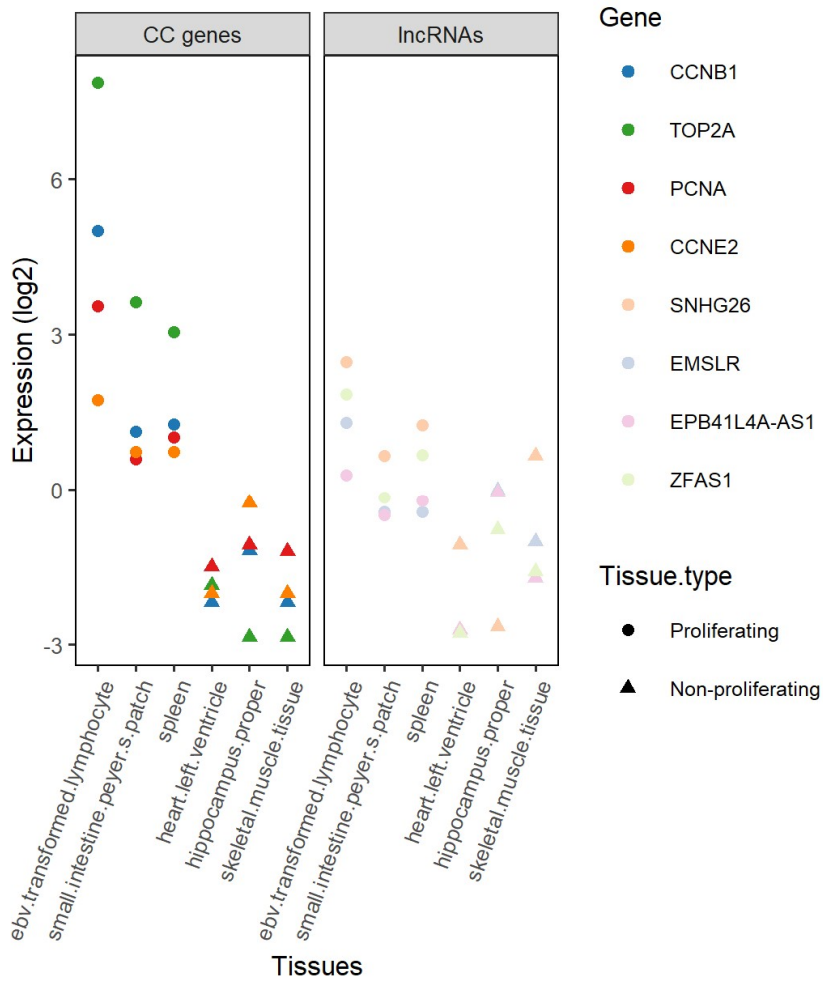

**Supplementary Figure S17: Expression data for known cell cycle genes and the four lincRNA candidates in proliferating and non-proliferating tissues.** Relative tissue expression (log transcript per kilobase million) of known cell cycle genes<sup>1</sup> and our cell cycle lincRNAs in selected tissues from the Genotype-Tissue Expression (GTEx) project. Gene expression values were normalized to relative expression values by subtracting the gene's average expression across all GTEx tissues.

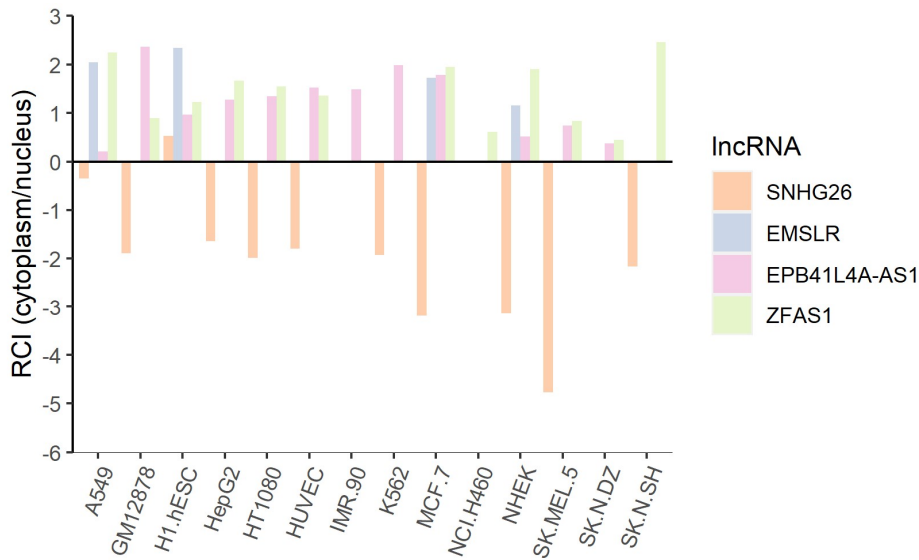

**Supplementary Figure S18: Subcellular localization of lncRNA candidates.** Data are from the lncAtlas (<https://lncatlas.crg.eu/>) and display the subcellular localization based on a relative concentration index (RCI) of RNA between cytoplasm and nucleus.

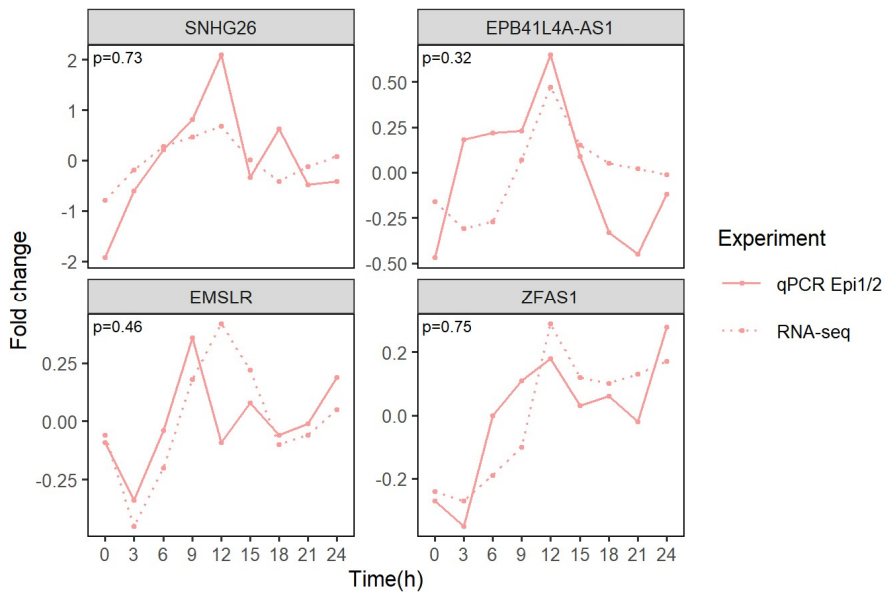

**Supplementary Figure S19: Technical validation of RNA-seq expression for *SNHG26*, *EPB41L4A-AS1*, *EMSLR*, and *ZFAS1*.** Spearman's correlation coefficients ( $\rho$ ) were calculated based on the mean RNA-seq expression per time point and mean RT-qPCR fold change per time point from original experiments (Epi1, Epi2).

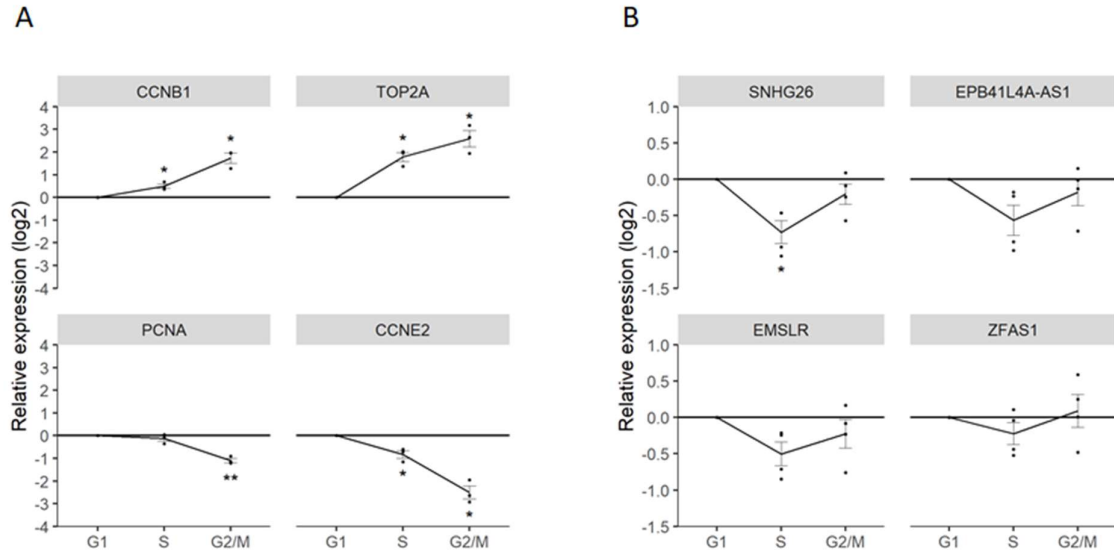

**Supplementary Figure S20: Fluorescence-activated cell sorting (FACS) analysis of HaCaT cells.** Relative expression (log<sub>2</sub>) for (A) *CCNB1*, *TOP2A*, *PCNA*, and *CCNE2* (n=3) and (B) *SNHG26*, *EPB41L4A-AS1*, *EMSLR*, and *ZFAS1* (n=4) as measured by RT-qPCR. Error bars represent standard error of mean (SEM). \*  $p \leq 0.05$ ; \*\*  $p \leq 0.01$  (Welch's *t*-test).

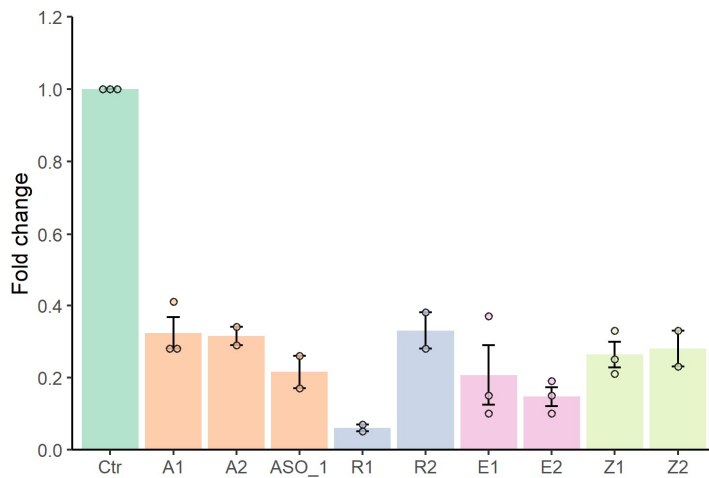

**Supplementary Figure S21: Percentage downregulation of the lncRNA candidates.** *SNHG26* (siRNAs; A1 and A2, and ASO\_1), *EMSLR* (siRNAs; R1 and R2), *EPB41L4A-AS1* (siRNAs; E1 and E2), and *ZFAS1* (siRNAs; Z1 and Z2). Data are presented as fold change expressions of target lncRNAs following siRNA/ASO-treatment relative to control-treated cells as measured by RT-qPCR in HaCaT cells. Bars and error bars are mean and SEM of two or more independent replicates.



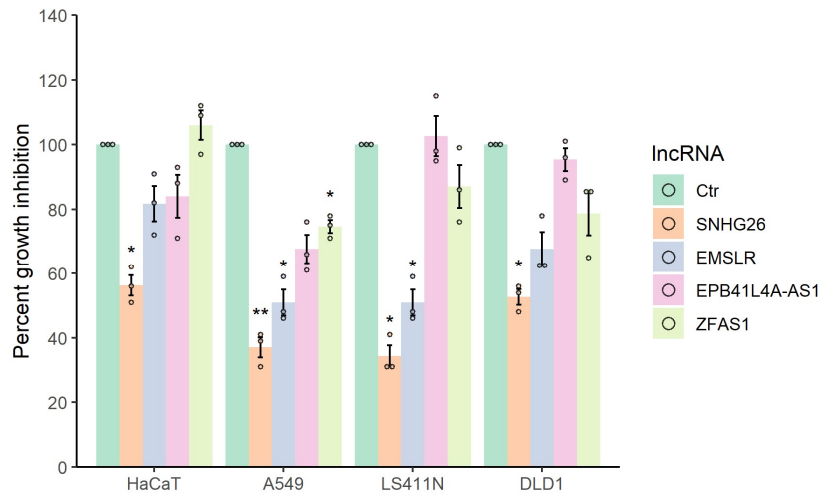

**Supplementary Figure S22: Proliferation assay results.** Effect of siRNA/ASO-mediated knockdown of *SNHG26* (ASO\_1), *EMSLR* (siRNA R2), *EPB41L4A-AS1* (siRNA E2), and *ZFAS1* (siRNA Z2) on proliferation in four different cell lines. Data are the number of cells following siRNA/ASO-treatment relative to control-treated cells (percentage of control) as measured by cell counting. Bars and error bars are mean and SEM of three independent replicates. \*  $p \leq 0.05$ ; \*\*  $p \leq 0.01$  (Welch's  $t$ -test,  $p$ -values were Bonferroni corrected for multiple testing). ANOVA  $p$ -values from the hierarchical, linear model: *SNHG26*  $p = 8.76 \times 10^{-6}$ , *EMSLR*  $p = 0.001$ , *EPB41L4A-AS1*  $p = 0.137$ , and *ZFAS1*  $p = 0.090$ .

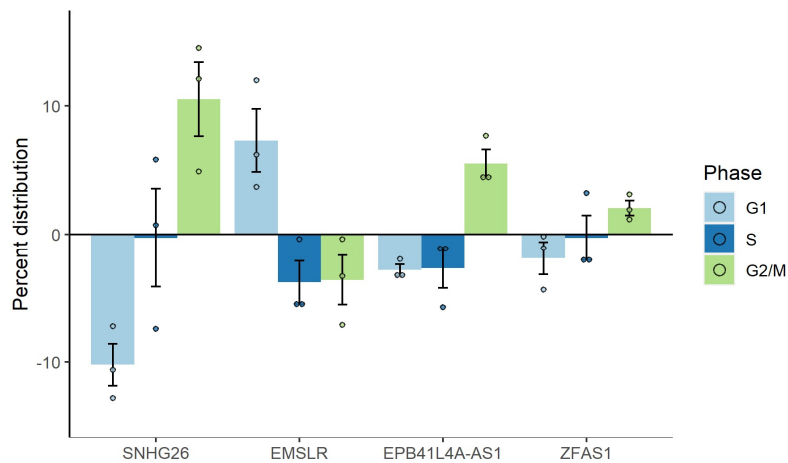

**Supplementary Figure S23: Cell cycle phase distribution results.** The distribution of cells in G1, S, and G2/M cell cycle phases in response to siRNA-mediated knockdown of *SNHG26* (siRNA A2), *EMSLR* (siRNA R2), *EPB41L4A-AS1* (siRNA E2), and *ZFAS1* (siRNA Z2) in HaCaT cells. Data are the difference in percentages of G1, S, and G2/M cells of siRNA-treated HaCaT cells to those of control-treated HaCaT cells. Bars and error bars are mean and SEM of three independent replicates. Welch's  $t$ -test  $p$ -values (non-significant) were Bonferroni corrected for multiple testing: *SNHG26* G2/M: 0.271, *EPB41L4A-AS1* G1: 0.095, and *EPB41L4A-AS1* G2/M: 0.143. ANOVA  $p$ -values were calculated from a hierarchical, linear model assuming a random effect for two independent siRNAs: *SNHG26*: G1:  $3.08 \times 10^{-6}$ , S: 0.669, G2/M:  $1.95 \times 10^{-6}$ , *EMSLR*: G1: 0.002, S: 0.006, G2/M: 0.629, *EPB41L4A-AS1* G1:  $6.01 \times 10^{-5}$ , S:  $5.81 \times 10^{-2}$ , G2/M:  $2.30 \times 10^{-6}$ , *ZFAS1*: G1: 0.014, S: 0.65, G2/M: 0.006.

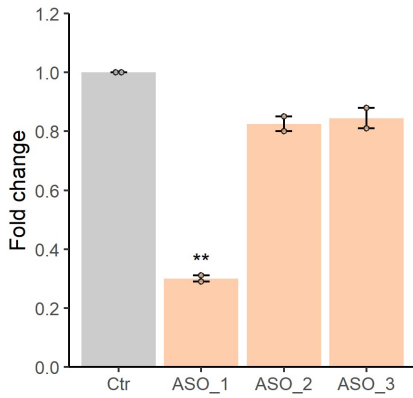

**Supplementary Figure S24: Percentage downregulation of *SNHG26* by using three ASOs with different target sequences.** Data are presented as fold change expressions of *SNHG26* following ASO treatment relative to control-treated cells as measured by RT-qPCR in HaCaT. Bars and error bars are mean and SEM of two independent replicates. \*\*  $p \leq 0.01$  (Welch's *t*-test).

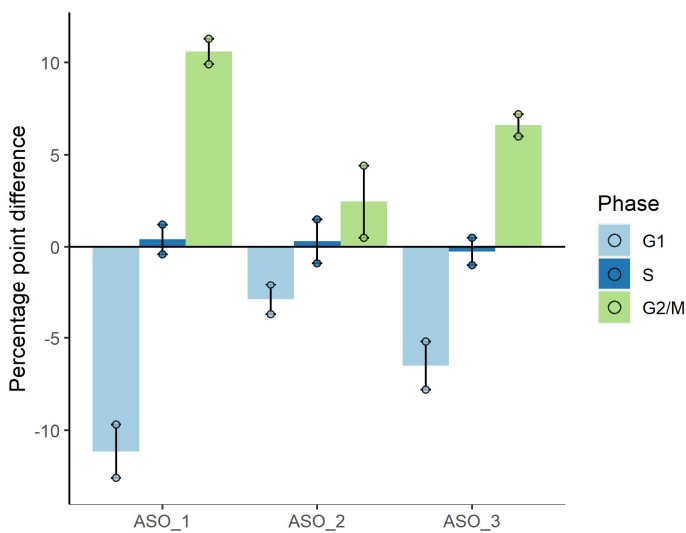

**Supplementary Figure S25: Cell cycle phase distribution in G1, S, and G2/M cell cycle phases after ASO-mediated knockdown of *SNHG26* in HaCaT cells.** Data are the difference in percentages of G1, S, and G2/M cells of ASO-treated HaCaT cells to those of control-treated HaCaT cells. Bars and error bars are mean and SEM of two independent replicates. Individual *p*-values were non-significant (Welch's *t*-test, Bonferroni corrected for multiple testing). ANOVA *p*-values across the three ASOs with different target sequences: G1: 1.84e-04, S: 0.91, G2/M: 2.75e-04.

## Supplementary tables

**Supplementary Table S1: Primer sequences of selected genes for Pol II ChIP-qPCR validations studies.** S = sense, AS = antisense

| Gene  | Sequence                       | PCR product (bp) |
|-------|--------------------------------|------------------|
| PCNA  | S-5'-TAGCTGGTTTCGGCTTCAGG-3'   | 106              |
|       | AS-5'-TAAACGGTTGCAGGCGTAG-3'   |                  |
| TOP2A | S-5'-AAGCGACTAAACAGGCAGG-3'    | 103              |
|       | AS-5'-GGCTAAAGGAAGGTTCAAGTG-3' |                  |
| CCNB1 | S-5'-ACGAACAGGCCAATAAGGAG-3'   | 103              |
|       | AS-5'-ACCCAGCAGAAACCAACAG-3'   |                  |
| CCNE2 | S-5'-GCTTCTTCTCCACATC-3'       | 102              |

**Supplementary Table S2: Long non-coding RNAs with RNA-seq/ChIP-seq Spearman's correlation values.** Gene type is from the Human Genes GRCh38.p13 database.

| EnsemblGene     | EntrezGene    | Phase | Gene type  | Cor PolII | Cor H3K4me3 | Cor H3K27me3 |
|-----------------|---------------|-------|------------|-----------|-------------|--------------|
| ENSG00000228649 | SNHG26        | G2/M  | lncRNA     | 0.84      | 0.49        | 0.70         |
| ENSG00000255121 | RP11-110I1.12 | S     | lncRNA     | 0.78      | 0.44        | 0.09         |
| ENSG00000163597 | SNHG16        | M/G1  | lncRNA     | 0.76      | 0.68        | NA           |
| ENSG00000259230 | CTD-2555C10.3 | S     | lncRNA     | 0.68      | 0.64        | NA           |
| ENSG00000173209 | AHSA2         | S     | pseudogene | 0.67      | 0.26        | NA           |
| ENSG00000275481 | RP11-474P2.6  | S     | lncRNA     | 0.66      | 0.55        | NA           |
| ENSG00000230133 | FLJ33581      | G2    | lncRNA     | 0.66      | NA          | 0.27         |
| ENSG00000257167 | TMPO-AS1      | S     | lncRNA     | 0.64      | -0.03       | NA           |
| ENSG00000251669 | FAM86EP       | G1/S  | pseudogene | 0.64      | 0.46        | 0.10         |
| ENSG00000182796 | TMEM198B      | S     | pseudogene | 0.62      | 0.13        | 0.12         |
| ENSG00000263753 | LINC00667     | S     | lncRNA     | 0.58      | 0.35        | 0.62         |
| ENSG00000256268 | RP11-221N13.3 | S     | lncRNA     | 0.55      | -0.26       | NA           |
| ENSG00000238105 | GOLGA2P5      | S     | pseudogene | 0.55      | NA          | NA           |
| ENSG00000204934 | ATP6V0E2-AS1  | S     | lncRNA     | 0.54      | 0.55        | 0.51         |
| ENSG00000235748 | SEPT14P12     | G2    | pseudogene | 0.53      | 0.19        | NA           |
| ENSG00000250685 | RP11-486L19.2 | S     | lncRNA     | 0.53      | 0.14        | -0.20        |
| ENSG00000237870 | AC073130.1    | S     | lncRNA     | 0.51      | 0.15        | NA           |
| ENSG00000240541 | TM4SF1-AS1    | S     | lncRNA     | 0.47      | -0.01       | NA           |
| ENSG00000213742 | ZNF337-AS1    | S     | lncRNA     | 0.47      | 0.20        | NA           |
| ENSG00000245213 | RP11-10K16.1  | S     | lncRNA     | 0.46      | 0.26        | 0.20         |
| ENSG00000250899 | RP11-253E3.3  | G1/S  | lncRNA     | 0.45      | 0.01        | -0.11        |
| ENSG00000281398 | SNHG4         | M/G1  | lncRNA     | 0.42      | 0.42        | NA           |
| ENSG00000214049 | UCA1          | M/G1  | lncRNA     | 0.42      | 0.05        | -0.13        |
| ENSG00000204177 | BMS1P1        | S     | pseudogene | 0.40      | 0.00        | NA           |
| ENSG00000226312 | CFLAR-AS1     | S     | lncRNA     | 0.38      | 0.04        | NA           |
| ENSG00000235897 | TM4SF19-AS1   | S     | lncRNA     | 0.38      | 0.49        | NA           |
| ENSG00000270332 | SMC2-AS1      | G1/S  | lncRNA     | 0.38      | 0.44        | 0.23         |
| ENSG00000197182 | MIRLET7BHG    | S     | lncRNA     | 0.37      | 0.21        | NA           |

|                 |               |      |            |       |       |       |
|-----------------|---------------|------|------------|-------|-------|-------|
| ENSG00000278864 | RP11-45M22.2  | M/G1 | TEC        | 0.37  | 0.25  | -0.27 |
| ENSG00000248092 | NNT-AS1       | G1/S | lncRNA     | 0.37  | 0.17  | NA    |
| ENSG00000267100 | ILF3-AS1      | G1/S | lncRNA     | 0.37  | 0.33  | NA    |
| ENSG00000204054 | LINC00963     | S    | lncRNA     | 0.35  | 0.18  | NA    |
| ENSG00000264538 | SUZ12P1       | G1/S | pseudogene | 0.35  | 0.35  | NA    |
| ENSG00000241769 | LINC00893     | S    | lncRNA     | 0.34  | 0.01  | -0.59 |
| ENSG00000225138 | CTD-2228K2.7  | S    | lncRNA     | 0.29  | 0.00  | -0.06 |
| ENSG00000280239 | CTB-50L17.8   | G1/S | TEC        | 0.28  | 0.37  | NA    |
| ENSG00000214826 | DDX12P        | S    | pseudogene | 0.28  | 0.13  | NA    |
| ENSG00000255198 | SNHG9         | G1/S | lncRNA     | 0.27  | 0.43  | -0.09 |
| ENSG00000225733 | FGD5-AS1      | S    | lncRNA     | 0.26  | -0.01 | NA    |
| ENSG00000230479 | AP000695.6    | S    | lncRNA     | 0.25  | 0.17  | NA    |
| ENSG00000233016 | SNHG7         | M/G1 | lncRNA     | 0.25  | 0.29  | 0.27  |
| ENSG00000237886 | NALT1         | S    | lncRNA     | 0.25  | 0.17  | NA    |
| ENSG00000232445 | EMSLR         | M/G1 | lncRNA     | 0.25  | 0.33  | 0.53  |
| ENSG00000274605 | RP11-12G12.7  | S    | lncRNA     | 0.24  | -0.18 | 0.05  |
| ENSG00000268573 | RP11-158H5.7  | S    | lncRNA     | 0.24  | -0.30 | NA    |
| ENSG00000274173 | RP4-568C11.4  | S    | lncRNA     | 0.21  | 0.06  | 0.45  |
| ENSG00000254635 | WAC-AS1       | S    | lncRNA     | 0.20  | -0.15 | NA    |
| ENSG00000197989 | SNHG12        | M/G1 | lncRNA     | 0.20  | 0.13  | 0.44  |
| ENSG00000215417 | MIR17HG       | M/G1 | lncRNA     | 0.19  | 0.12  | -0.40 |
| ENSG00000177410 | ZFAS1         | G1/S | lncRNA     | 0.18  | 0.36  | 0.43  |
| ENSG00000224032 | EPB41L4A-AS1  | M/G1 | lncRNA     | 0.16  | 0.51  | 0.31  |
| ENSG00000233901 | LINC01503     | S    | lncRNA     | 0.16  | 0.29  | -0.17 |
| ENSG00000269893 | SNHG8         | G1/S | lncRNA     | 0.15  | 0.24  | 0.38  |
| ENSG00000255717 | SNHG1         | G1/S | lncRNA     | 0.14  | -0.31 | 0.06  |
| ENSG00000267080 | ASB16-AS1     | S    | lncRNA     | 0.13  | 0.04  | NA    |
| ENSG00000259488 | RP11-154J22.1 | G1/S | lncRNA     | 0.12  | -0.02 | -0.31 |
| ENSG00000154874 | CCDC144B      | S    | pseudogene | 0.11  | -0.28 | 0.16  |
| ENSG00000226950 | DANCR         | G1/S | lncRNA     | 0.11  | -0.09 | 0.07  |
| ENSG00000251562 | MALAT1        | S    | lncRNA     | 0.10  | 0.28  | NA    |
| ENSG00000254531 | FLJ20021      | S    | lncRNA     | 0.08  | -0.27 | NA    |
| ENSG00000272468 | RP1-86C11.7   | M/G1 | lncRNA     | 0.08  | -0.22 | NA    |
| ENSG00000236384 | LINC00479     | S    | lncRNA     | 0.07  | -0.05 | NA    |
| ENSG00000254837 | AP001372.2    | S    | lncRNA     | 0.06  | -0.28 | 0.00  |
| ENSG00000260260 | SNHG19        | M/G1 | lncRNA     | 0.06  | 0.28  | -0.01 |
| ENSG00000234327 | AC012146.7    | S    | lncRNA     | 0.05  | -0.21 | 0.25  |
| ENSG00000231298 | LINC00704     | S    | lncRNA     | 0.04  | 0.08  | NA    |
| ENSG00000268798 | CTB-25B13.5   | M/G1 | lncRNA     | 0.04  | -0.03 | 0.18  |
| ENSG00000268364 | SMC5-AS1      | S    | lncRNA     | 0.04  | -0.45 | NA    |
| ENSG00000261578 | RP11-21L23.2  | G2/M | lncRNA     | 0.04  | NA    | NA    |
| ENSG00000204860 | FAM201A       | S    | lncRNA     | 0.03  | -0.34 | NA    |
| ENSG00000180385 | EMC3-AS1      | G1/S | pseudogene | 0.00  | -0.10 | -0.18 |
| ENSG00000241015 | TPM3P9        | G1/S | pseudogene | 0.00  | 0.52  | 0.12  |
| ENSG00000236751 | LINC01186     | S    | lncRNA     | 0.00  | -0.18 | -0.50 |
| ENSG00000251381 | LINC00958     | G1/S | lncRNA     | -0.02 | 0.23  | 0.28  |

|                 |              |      |            |       |       |       |
|-----------------|--------------|------|------------|-------|-------|-------|
| ENSG00000234741 | GAS5         | M/G1 | lncRNA     | -0.02 | 0.08  | -0.49 |
| ENSG00000258727 | RP11-66N24.3 | S    | lncRNA     | -0.05 | -0.30 | -0.07 |
| ENSG00000279873 | LINC01126    | S    | lncRNA     | -0.07 | -0.02 | NA    |
| ENSG00000230937 | MIR205HG     | S    | lncRNA     | -0.07 | 0.17  | 0.18  |
| ENSG00000203709 | C1orf132     | S    | lncRNA     | -0.08 | -0.44 | -0.36 |
| ENSG00000249042 | CTD-2015H6.3 | S    | lncRNA     | -0.12 | -0.04 | NA    |
| ENSG00000253669 | KB-1732A1.1  | S    | lncRNA     | -0.13 | -0.30 | NA    |
| ENSG00000237813 | AC002066.1   | S    | lncRNA     | -0.15 | -0.52 | NA    |
| ENSG00000232995 | RGS5         | S    | lncRNA     | -0.17 | -0.20 | NA    |
| ENSG00000187951 | ARHGAP11B    | G2   | lncRNA     | -0.18 | -0.29 | NA    |
| ENSG00000206337 | HCP5         | G2   | lncRNA     | -0.21 | -0.42 | NA    |
| ENSG00000235609 | AF127936.9   | G1/S | lncRNA     | -0.23 | NA    | NA    |
| ENSG00000260708 | CTA-29F11.1  | M/G1 | lncRNA     | -0.28 | -0.19 | NA    |
| ENSG00000260032 | LINC00657    | S    | lncRNA     | -0.29 | -0.39 | NA    |
| ENSG00000263412 | RP5-890E16.2 | G1/S | lncRNA     | -0.32 | -0.01 | NA    |
| ENSG00000269896 | RP4-740C4.5  | S    | pseudogene | -0.35 | 0.27  | 0.00  |
| ENSG00000227036 | LINC00511    | S    | lncRNA     | -0.38 | -0.37 | -0.16 |
| ENSG00000230844 | ZNF674-AS1   | M/G1 | lncRNA     | -0.42 | -0.52 | -0.51 |
| ENSG00000203875 | SNHG5        | G1/S | lncRNA     | -0.61 | -0.35 | NA    |
| ENSG00000244879 | GABPB1-AS1   | S    | lncRNA     | -0.80 | -0.78 | NA    |
| ENSG00000204789 | ZNF204P      | S    | pseudogene | NA    | NA    | 0.21  |
| ENSG00000231007 | CDC20P1      | M/G1 | pseudogene | NA    | NA    | 0.18  |
| ENSG00000234176 | HSPA8P1      | M/G1 | pseudogene | NA    | NA    | -0.23 |

TEC = To be Experimentally confirmed

### Supplementary Table S3: Info about the four lncRNA candidates.

| Ensembl Gene ID | lncRNA names                        | Localization                      | Strand | Transcripts | Coding probability (CP*) |
|-----------------|-------------------------------------|-----------------------------------|--------|-------------|--------------------------|
| ENSG00000224032 | EPB41L4A-AS1<br>TIGA1               | Chr5: 112,160,526-<br>112,164,818 | Plus   | 5           | 0.1416                   |
| ENSG00000177410 | ZFAS1                               | Chr20: 49,278,178-<br>49,299,600  | Plus   | 14          | 0.0730                   |
| ENSG00000232445 | EMSLR<br>RP11-132A1.4<br>AC006329.1 | Chr7: 101,308,270-<br>101,314,800 | Plus   | 2           | 0.0167                   |
| ENSG00000228649 | SNHG26<br>AC005602.5                | Chr7: 22,854,126-<br>22,872,945   | Plus   | 13          | 0.0077                   |

\*CP values are results from the Coding Potential Assessment Tool. Human CP cutoff is 0.364. CP  $\geq$  0.364 indicates coding sequence, whereas CP  $<$  0.364 indicates noncoding sequence<sup>2</sup>.

**Supplementary Table S4: Primers used for RT-qPCR.** Qiagen QuantiTect primer assays (249900) were used for mRNA expression analysis and Qiagen RT<sup>2</sup> IncRNA PCR assays (330701) were used for IncRNA expression analysis.

| Gene         | Primer assay                                             | Cat.no        |
|--------------|----------------------------------------------------------|---------------|
| GAPDH        | Hs_GAPDH_1_SG QuantiTect Primer Assay                    | QT00079247    |
| PCNA         | Hs_PCNA_1_SG QuantiTect Primer Assay                     | QT00024633    |
| TOP2A        | Hs_TOP2A_1_SG QuantiTect Primer Assay                    | QT00037632    |
| CCNB1        | Hs_CCNB1_1_SG QuantiTect Primer Assay                    | QT00006615    |
| CCNE2        | Hs_CCNE2_1_SG QuantiTect Primer Assay                    | QT00063511    |
| SNHG26       | RT <sup>2</sup> IncRNA qPCR Assay for Human LOC101927841 | LPH07369A-200 |
| EPB41L4A-AS1 | RT <sup>2</sup> IncRNA qPCR Assay for Human EPB41L4A-AS1 | LPH04387A-200 |
| EMSLR        | RT <sup>2</sup> IncRNA qPCR Assay for Human EMSLR        | LPH09823A-200 |
| ZFAS1        | RT <sup>2</sup> IncRNA qPCR Assay for Human ZFAS1        | LPH01402A-200 |

**Supplementary Table S5: Human control qPCR primer sets from Active Motif.** Human control qPCR primer sets are designed to serve as positive or negative ChIP controls when performing ChIP with human samples.

| Primer set                                | Location               | Cat.no | Control for                  |
|-------------------------------------------|------------------------|--------|------------------------------|
| Human positive control primer set ACTB-2  | ACTB promoter          | 71005  | H3K4me3 and Pol II           |
| Human positive control primer set GAPDH-2 | GAPDH intron 1         | 71006  | H3K4me3 and Pol II           |
| Human positive control primer set MYT1    | MYT1 promoter          | 71007  | H3K27me3                     |
| Human positive control primer set CCND2   | CCND2 promoter         | 71008  | H3K27me3                     |
| Human negative control primer set 1       | Gene desert on chr. 12 | 71001  | H3K4me3, Pol II and H3K27me3 |

**Supplementary Table S6: Antisense oligos and siRNAs used in RNA interference experiments.**

| Target lncRNA      | Alias | Cat.no     | Producer  | Sense sequence        | Target   |
|--------------------|-------|------------|-----------|-----------------------|----------|
| EPB41L4A-AS1       | E1    | CTM-431273 | Dharmacon | ACAGUGAGGAUGUGAAUAAUU |          |
| EPB41L4A-AS1       | E2    | CTM-431274 | Dharmacon | GUGAGGAUGUGAAUAAUAAUU |          |
| ZFAS1              | Z1    | Custom     | Sigma     | CUUUGAUUGAACCAGGAUG   |          |
| ZFAS1              | Z2    | Custom     | Sigma     | AGUAGAAUUAUUAUUAACA   |          |
| EMSLR              | R1    | Custom     | Sigma     | CACAGGAUGUGCAGAUCUC   |          |
| EMSLR              | R2    | Custom     | Sigma     | GAAAUGUCAUAUAGAGAAU   |          |
| SNHG26             | A1    | Custom     | Sigma     | CUGCAUUCUUGUCCUCAU    |          |
| SNHG26             | A2    | CTM-431277 | Dharmacon | GAAAGGAGGCUGAGUAAUUUU |          |
| SNHG26             | ASO_1 | 339517     | Qiagen    | GGAAGCCACAGTAGTA      | Exon 4   |
| SNHG26             | ASO_2 | 339517     | Qiagen    | CCTGATTAACGTTGG       | Intron 1 |
| SNHG26             | ASO_3 | 339517     | Qiagen    | CACTGCGGAGATCAAG      | Exon 1   |
| siRNA neg. control | Ctr   | SIC001     | Sigma     |                       |          |
| ASO neg. control A | Ctr   | 339515     | Qiagen    | AACACGTCTATACGC       |          |

## References

- Whitfield, M. L. *et al.* Identification of genes periodically expressed in the human cell cycle and their expression in tumors. *Mol Biol Cell* **13**, 1977-2000, doi:10.1091/mbc.02-02-0030 (2002).
- Chakraborty, S., Deb, A., Maji, R. K., Saha, S. & Ghosh, Z. LncRBase: an enriched resource for lncRNA information. *PLoS one* **9**, e108010, doi:10.1371/journal.pone.0108010 (2014).
